# Supplementary material for: NBM-BMX, an HDAC8 Inhibitor, Overcomes Temozolomide Resistance in Glioblastoma Multiforme by Downregulating the β-Catenin/c-Myc/SOX2 Pathway and Upregulating p53-Mediated MGMT Inhibition
Source: MDPI journal article supplement (doi:10.3390/ijms22115907), 2021-05-31
Supplement: s1 [file s1]

**A**

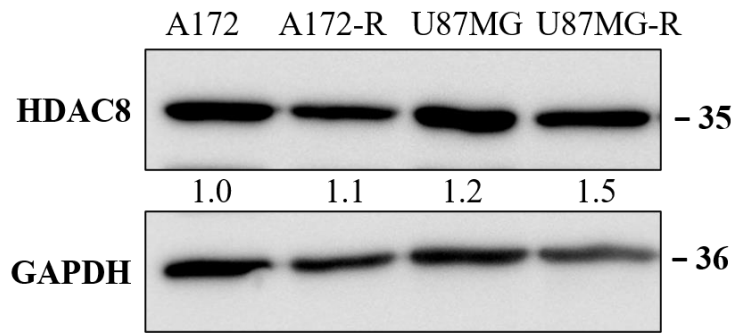

**B**

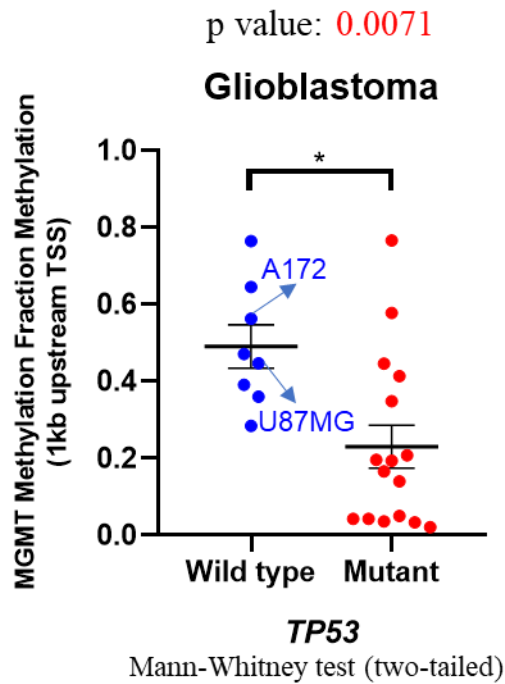

**Figure S1. Genetic features of GBM cell lines.** (A) The expression of HDAC8 from Abcam company in GBM cells by western blot. Supplementary Figure S2. BMX is a potent semi synthesized HDAC8 inhibitor. (B) The examination of MGMT methylation pairs GBM through big data analysis. The wide-type and mutant are labeled with blue and red, respectively (one-sided t test, \*  $p < 0.05$ ).

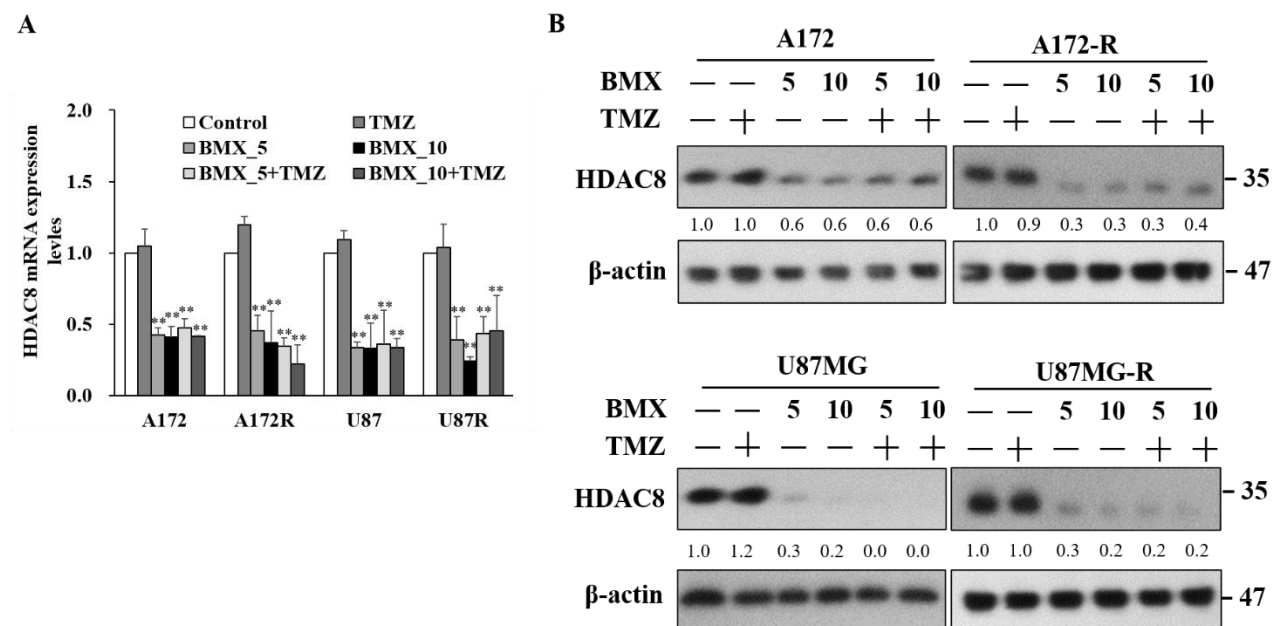

**Figure S2. BMX is a potent semi synthesized HDAC8 inhibitor.** (A) HDAC8 expression levels stimulated with different doses of BMX (0-10  $\mu$ M) in the presence or absence of TMZ (50  $\mu$ M) were determined using qRT-PCR assays. (B) HDAC8 expression levels stimulated with BMX (0-10  $\mu$ M) with or without TMZ (50  $\mu$ M) were determined using Western blotting.

A

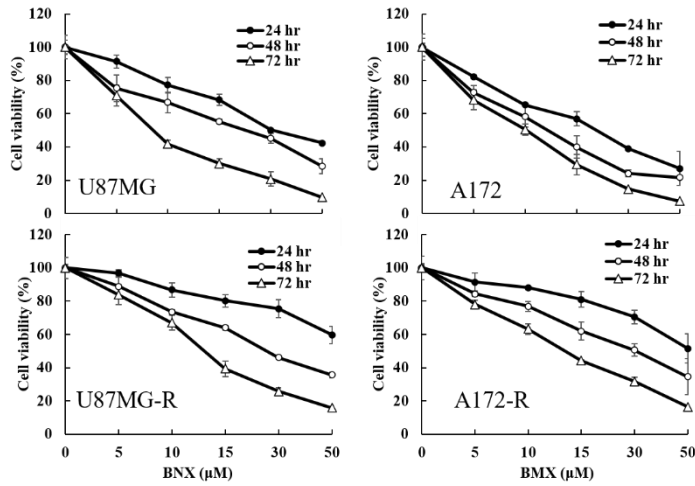

B

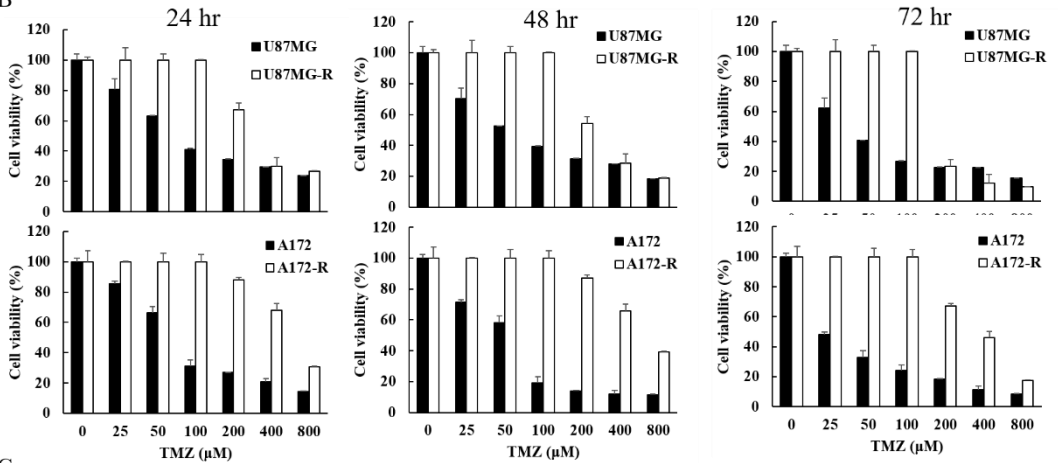

C

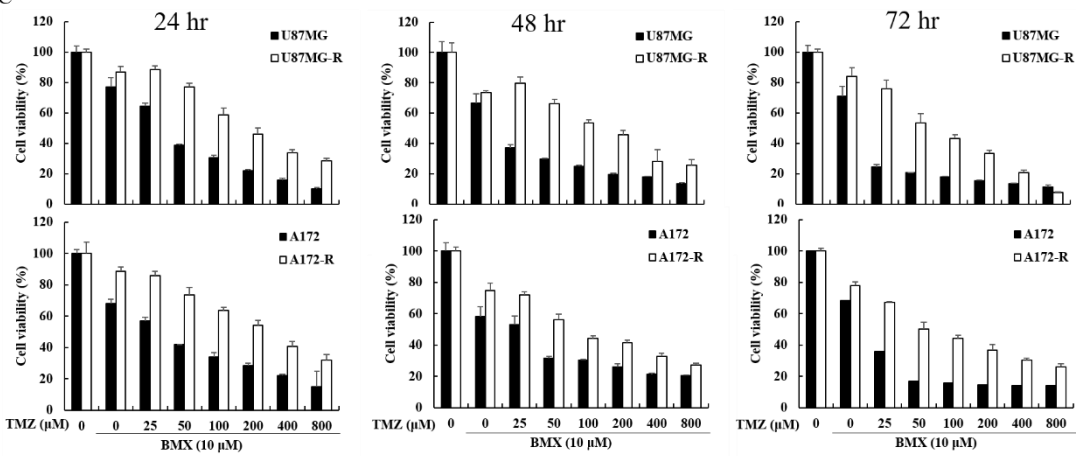

D

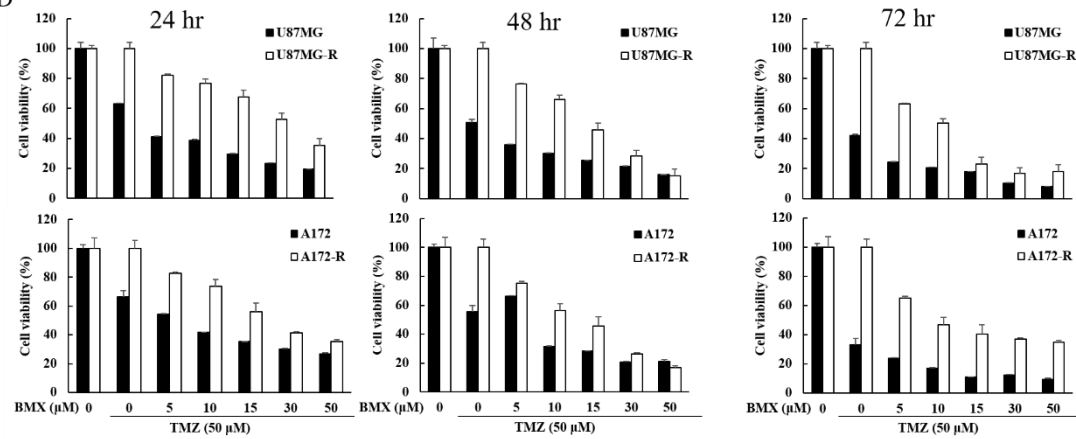

**Figure S3. BMX and BMX with TMZ inhibits the growth and proliferation of U87MG, U87MG-R, A172 and A172-R.** (A) Cell viability of GBM and GBM-R cell lines after treating with indicated concentrations of BMX (0.5, 10, 15, 30 or 50  $\mu$ M) for 24, 48 and 72 hrs. (B) Cell viability of GBM and GBM-R cell lines after treating with the indicated concentrations of TMZ (0.25, 50, 100, 200, 400 or 800  $\mu$ M) 24, 48 and 72 hrs. (C) Cell viability of GBM and GBM-R cells lines after treating with 10  $\mu$ M BMX with or without TMZ at different concentrations (0.25, 50, 100, 200, 400 or 800  $\mu$ M for 24, 48 and 72 hrs. (D) Cell viability of GBM and GBM-R cells lines after treating with 50 $\mu$ M TMZ with or without BMX at different concentrations (0.5, 10, 15, 30 or 50  $\mu$ M) for 24, 48 and 72 hrs. (E) Cell viability of GBM-R cells lines after treating with 50  $\mu$ M TMZ with or without 10  $\mu$ M BMX for 24, 48 and 72 hrs.

**A**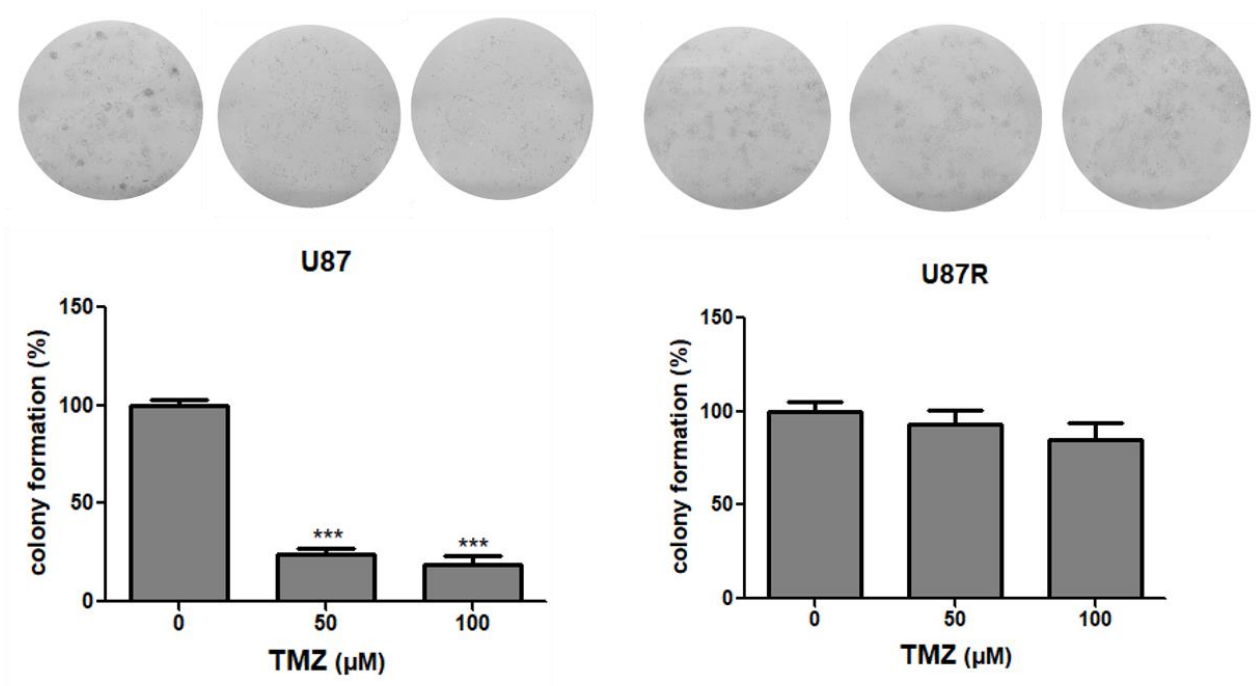**B**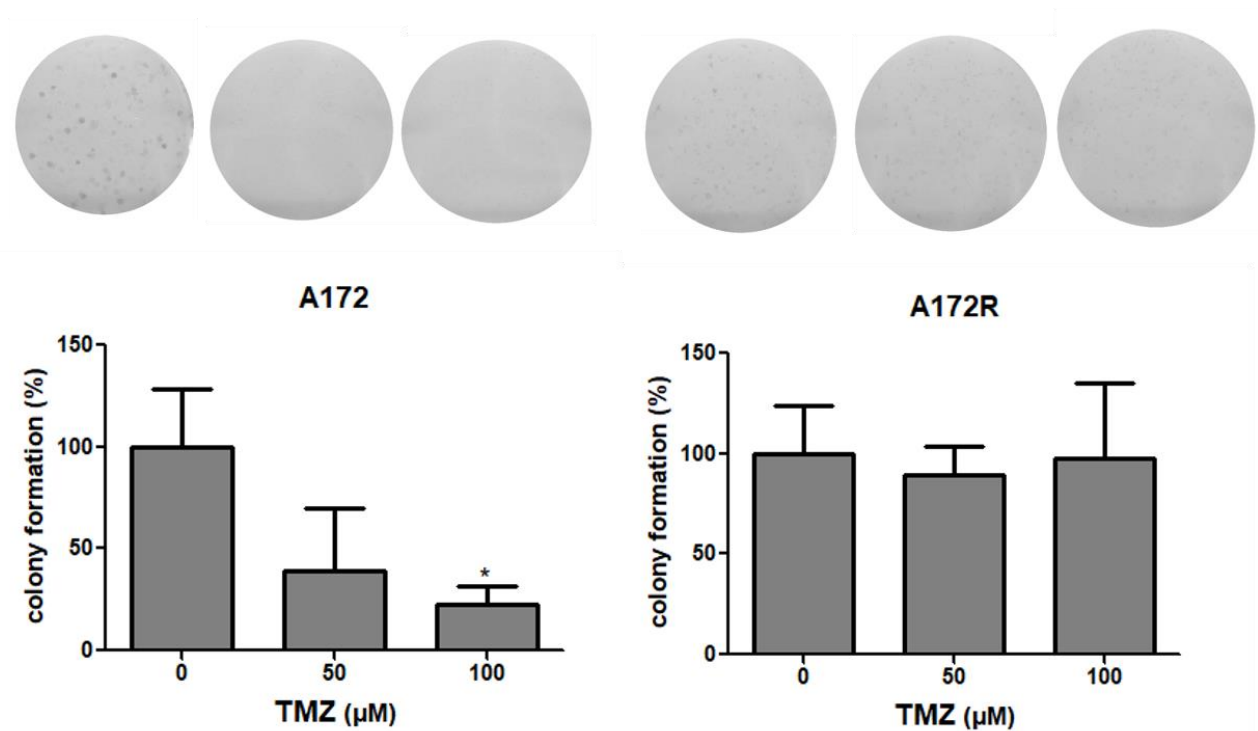

**Figure S4. In vitro cytotoxicity of BMX in GBM cells.** (A) U87 and U87R cells and (B) A172 and A172R cells were treated with TMZ (50 and 100  $\mu\text{M}$ ). This inhibitory effect of TMZ on GBM cells was determined using a clonogenic assay. \* $p < 0.05$ ; \*\* $p < 0.01$ ; \*\*\* $p < 0.001$ .

**Table S1. The drug and gene information in Glioblastoma.**

| Cell Line Name | cancer type | subtype      | Temozolomide                         | MGMT                                       |                                  |                                | TP53                           |                                  |                                | HDAC8                          |                                  |                                |
|----------------|-------------|--------------|--------------------------------------|--------------------------------------------|----------------------------------|--------------------------------|--------------------------------|----------------------------------|--------------------------------|--------------------------------|----------------------------------|--------------------------------|
|                |             |              | log2 fold change<br>(Primary Screen) | Methylation Fraction<br>(1kb upstream TSS) | Expression Public<br>log2(TPM+1) | Relative Protein<br>Expression | Mutation<br>(one hot encoding) | Expression Public<br>log2(TPM+1) | Relative Protein<br>Expression | Mutation<br>(one hot encoding) | Expression Public<br>log2(TPM+1) | Relative Protein<br>Expression |
| SF295          | glioma      | Glioblastoma | 0.5225                               | 0.19374                                    | 1.03562391                       | -2.139226981                   | 1                              | 5.819412726                      | 2.393073817                    | 0                              | 4.502712486                      | #N/A                           |
| GB1            | glioma      | Glioblastoma | 0.4427                               | 0.41405                                    | 0.042644337                      | -3.805706295                   | 1                              | 7.565216347                      | 2.73863664                     | 0                              | 4.874796966                      | #N/A                           |
| YKG1           | glioma      | Glioblastoma | 0.3359                               | 0.05019                                    | 4.146492307                      | #N/A                           | 1                              | 6.930737338                      | #N/A                           | 0                              | 5.270528942                      | #N/A                           |
| A172           | glioma      | Glioblastoma | 0.3263                               | 0.56288                                    | 0.084064265                      | -2.996286542                   | 0                              | 6.583308465                      | -1.299763044                   | 0                              | 4.631686366                      | 1.192438806                    |
| KNS81          | glioma      | Glioblastoma | 0.3098                               | 0.39117                                    | 0.111031312                      | -2.080205897                   | 0                              | 6.587665021                      | -0.441223524                   | 0                              | 4.859969548                      | -1.749575686                   |
| YH13           | glioma      | Glioblastoma | 0.3018                               | 0.04314                                    | 3.601696516                      | #N/A                           | 1                              | 4.859472667                      | #N/A                           | 0                              | 5.073820233                      | #N/A                           |
| SNU466         | glioma      | Glioblastoma | 0.2716                               | #N/A                                       | 3.980939266                      | #N/A                           | 0                              | 5.593054922                      | #N/A                           | 0                              | 4.496334513                      | #N/A                           |
| U87MG          | glioma      | Glioblastoma | 0.1112                               | 0.44678                                    | 0.070389328                      | -3.64685368                    | 0                              | 4.093391153                      | -1.870347741                   | 0                              | 4.618238656                      | -0.052702426                   |
| LN18           | glioma      | Glioblastoma | 0.0981                               | #N/A                                       | 4.106850796                      | -0.031596888                   | 1                              | 5.890689878                      | 2.254288844                    | 0                              | 5.314696526                      | -0.073179017                   |
| GAMG           | glioma      | Glioblastoma | 0.0947                               | 0.03358                                    | 0.555816155                      | -2.090445832                   | 1                              | 5.277984747                      | 0.274042443                    | 0                              | 4.790772038                      | #N/A                           |
| T98G           | glioma      | Glioblastoma | 0.0549                               | #N/A                                       | 3.360364277                      | #N/A                           | 1                              | 6.799216853                      | #N/A                           | 0                              | 4.676380255                      | #N/A                           |
| SNU489         | glioma      | Glioblastoma | -0.0105                              | 0.03636                                    | 1.981852653                      | #N/A                           | 1                              | 4.685940148                      | #N/A                           | 0                              | 4.363871925                      | #N/A                           |
| SNU1105        | glioma      | Glioblastoma | -0.0202                              | 0.19596                                    | 0.042644337                      | -1.942780912                   | 1                              | 5.516330387                      | -0.641586527                   | 0                              | 4.69432306                       | #N/A                           |
| DBTRG05MG      | glioma      | Glioblastoma | -0.0684                              | 0.36067                                    | 0.028569152                      | #N/A                           | 0                              | 4.970853654                      | #N/A                           | 0                              | 4.818134761                      | #N/A                           |
| CAS1           | glioma      | Glioblastoma | -0.0712                              | 0.20797                                    | 0.014355293                      | #N/A                           | 1                              | 6.077029314                      | #N/A                           | 0                              | 4.243364426                      | #N/A                           |
| KNS60          | glioma      | Glioblastoma | -0.1272                              | 0.34877                                    | 2.799087306                      | #N/A                           | 1                              | 6.578334949                      | #N/A                           | 0                              | 4.329841177                      | #N/A                           |
| KNS42          | glioma      | Glioblastoma | -0.1520                              | #N/A                                       | 0.097610797                      | -2.561048733                   | 1                              | 5.231893162                      | -1.184272773                   | 0                              | 4.906409617                      | #N/A                           |
| GMS10          | glioma      | Glioblastoma | -0.2605                              | 0.57795                                    | 0.070389328                      | #N/A                           | 1                              | 6.648753033                      | #N/A                           | 0                              | 5.146084939                      | #N/A                           |
| NMCG1          | glioma      | Glioblastoma | -0.2967                              | 0.28477                                    | 0.124328135                      | #N/A                           | 0                              | 5.184280294                      | #N/A                           | 0                              | 4.258518925                      | #N/A                           |
| KALS1          | glioma      | Glioblastoma | -0.3007                              | 0.14005                                    | 3.995484519                      | #N/A                           | 1                              | 6.468420402                      | #N/A                           | 0                              | 5.582254908                      | #N/A                           |
| LN229          | glioma      | Glioblastoma | -0.4896                              | 0.76593                                    | 0.097610797                      | -2.376906118                   | 1                              | 5.590362488                      | -0.682367861                   | 0                              | 5.183089461                      | 0.329211577                    |
| DKMG           | glioma      | Glioblastoma | -0.4971                              | 0.76473                                    | 0.070389328                      | #N/A                           | 0                              | 5.472162804                      | #N/A                           | 0                              | 4.445594291                      | #N/A                           |
| SNU201         | glioma      | Glioblastoma | -0.5962                              | 0.02159                                    | 0.970853654                      | #N/A                           | 1                              | 7.018923432                      | #N/A                           | 0                              | 4.756489607                      | #N/A                           |
| GOS3           | glioma      | Glioblastoma | -0.9443                              | 0.64582                                    | 0.028569152                      | #N/A                           | 0                              | 6.235918488                      | #N/A                           | 0                              | 4.712045449                      | #N/A                           |
| GII            | glioma      | Glioblastoma | -1.6327                              | 0.44628                                    | 0.056583528                      | #N/A                           | 1                              | 5.975217457                      | #N/A                           | 0                              | 4.689858236                      | #N/A                           |

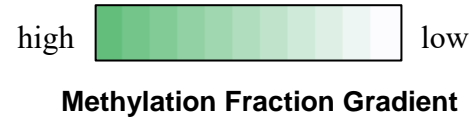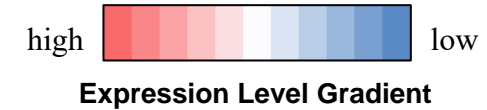

**Table S2. CCLE p53 genetic features.**

| Tp53-WT   |         | Tp53-mut |         |
|-----------|---------|----------|---------|
| SF126     | KS1     | LN229    | YKG1    |
| BECKER    | MOGGUVW | SW1783   | X8MGBA  |
| GOS3      | U87MG   | TM31     | MOGGCCM |
| KNS81     | LN443   | U138MG   |         |
| KG1C      | LN235   | SF295    |         |
| AM38      | SF172   | M059K    |         |
| H4        | U343    | GI1      |         |
| D283MED   | U178    | KNS60    |         |
| NMCG1     | F5      | KALS1    |         |
| YH13      | SF767   | CAS1     |         |
| DKMG      | A1207   | KNS42    |         |
| U118MG    | LN319   | SNU201   |         |
| GB1       | LN382   | SNU1105  |         |
| SNU489    | LNZ308  | SNU738   |         |
| SNU466    | LN340   | SNU626   |         |
| CCFSTTG1  | CH157MN | DAOY     |         |
| D341MED   | SF268   | SW1088   |         |
| ONS76     | SF539   | HS683    |         |
| DBTRG05MG | SNB75   | LN18     |         |
| A172      |         | T98G     |         |
| X1321N1   |         | GMS10    |         |
| SNB19     |         | X42MGBA  |         |
| U251MG    |         | GAMG     |         |

**Table S3. Experimental antibodies.**

| <b>Designation</b> | <b>Source or Reference</b>     | <b>Identifiers</b> | <b>Additional Information</b> |
|--------------------|--------------------------------|--------------------|-------------------------------|
| GAPDH              | Arigo, Hsinchu, Taiwan         | ARG10112           | 1:5000                        |
| $\beta$ -actin     | Santa Cruz, CA, USA            | sc-47778           | 1:2000                        |
| HDAC8              | ABclonal, Woburn, MA, USA      | A8865              | 1:1000                        |
| c-Myc              | Cell Signaling Technology, Inc | #5605s             | 1:1000                        |
| cyclin D1          | Cell Signaling Technology, Inc | #2978s             | 1:1000                        |
| cyclin B           | Cell Signaling Technology, Inc | #12231s            | 1:1000                        |
| Caspase-3          | (Pro and Active) Novus, USA    | NB100-56708        | 1:1000                        |
| Bax                | Cell Signaling Technology, Inc | #2772s             | 1:1000                        |
| p21                | Cell Signaling Technology, Inc | #2947s             | 1:1000                        |
| Bcl-xL             | Cell Signaling Technology, Inc | #2764s             | 1:1000                        |
| phospho-p53        | p15;                           | #9284s             | 1:1000                        |
| puma               | Cell Signaling Technology, Inc | #12450s            | 1:1000                        |
| MGMT               | Cell Signaling Technology, Inc | #2739s             | 1:1000                        |
| p53                | Santa Cruz, CA, USA            | sc-126             | 1:1000                        |
| CD133              | Cell Signaling Technology, Inc | #5860s             | 1:1000                        |
| CD44               | Abcam, Cambridge, MA, USA      | ab157107           | 1:1000                        |
| SOX-2              | Cell Signaling Technology, Inc | ab97959            | 1:1000                        |
